# Supplementary material for: New visible light excitable donor–acceptor 7-hydroxy-coumarins as blue fluorescent probes for selective staining of vacuoles in yeasts and L. donovani
Source: Royal Society of Chemistry journal article supplement (doi:10.1039/c6tb03257e), 2017-01-01
Supplement: c6tb03257e1.pdf [file c6tb03257e1.pdf]

## Electronic Supplementary Information

### **New Visible Light Excitable Donor-Acceptor 7-Hydroxy-coumarins as Blue Fluorescent Probes for Selective Staining of Vacuoles in Yeasts and *L. donovani***

Ashutosh Raghuvanshi,<sup>a</sup> Ajay Kumar Jha,<sup>a</sup> Manoj Kathuria,<sup>b</sup> Bhanu Priya Awasthi,<sup>b</sup> Deepak Purohit,<sup>a</sup> Kalyan Mitra,<sup>\*b</sup> and Atul Goel<sup>\*a,c</sup>

<sup>a</sup>Fluorescent Chemistry Lab, Division of Medicinal and Process Chemistry, CSIR-Central Drug Research Institute (CDRI), Lucknow 226031, India

<sup>b</sup>Electron Microscopy Unit, CSIR-Central Drug Research Institute (CDRI), Lucknow 226031, India

<sup>c</sup>Academy of Scientific and Innovative Research, New Delhi 110001, India

atul\_goel@cdri.res.in

### Table of Contents

|                                                                                                                       |
|-----------------------------------------------------------------------------------------------------------------------|
| Photophysical data of absorption, excitation and emission Spectra of synthesized dyes <b>4a-d</b> , in HEPES buffer   |
| Computed TDDFT data and cartesian coordinates of ( <b>CHMCs</b> )                                                     |
| Cytotoxicity study of <b>CHMCs 4a-c</b> in <i>Leishmania donovani</i>                                                 |
| Confocal microscopy images showing MDY-64 to stain the vacuolar membranes of <i>S. cerevisiae</i> and <i>S. Pombe</i> |
| Cytotoxicity study of <b>CHMCs 4a-c</b> in <i>S. cerevisiae</i> and <i>S. pombe</i>                                   |
| Photostability experiment of <b>CHMC 4b</b> in HEPES buffer under UV irradiation                                      |
| pH study of <b>CHMCs 4a,b</b> ( $2.5 \times 10^{-6}$ M) in TDW water                                                  |
| Competitive experiment of <b>CHMCs 4a,b</b> with Cysteine (Cys) and Glutathione (GSH)                                 |
| Copy of <sup>1</sup> H and <sup>13</sup> C NMR of dyes <b>4a-d</b> , <b>5-8</b>                                       |
| Cartesian coordinates (Å) of <b>CHMCs 4a-d</b> optimized at B3LYP/6-31G (d, p)                                        |

### Photophysical properties of Synthesized dyes 4a-d, 5-8 .

Absorption, Excitation and Emission spectra were recorded with UV-vis and fluorescence spectrophotometer. Samples were prepared in HEPES buffer (pH=7.2 at 25°C) final concentration of  $2.5 \times 10^{-6}$  M.

**Table S1: Photophysical data of 4a-d, in HEPES (pH=7.2)**

| Entry | Excitation Wavelength $\lambda_{\max}$ (nm) <sup>a</sup> | Emission Wavelength $\lambda_{\max}$ (nm) <sup>b</sup> | Quantum Yield $\Phi$ (%) <sup>c</sup> | HOMO <sup>d</sup> (eV) | LUMO <sup>d</sup> (eV) | Energy gap $E_g$ <sup>d</sup> (eV) |
|-------|----------------------------------------------------------|--------------------------------------------------------|---------------------------------------|------------------------|------------------------|------------------------------------|
| 4a    | 419                                                      | 483                                                    | 37                                    | -6.915                 | -3.048                 | 3.868                              |
| 4b    | 425                                                      | 487                                                    | 54                                    | -6.931                 | -3.467                 | 3.464                              |
| 4c    | 431                                                      | 506                                                    | 29                                    | -6.992                 | -3.231                 | 3.761                              |
| 4d    | 426                                                      | 488                                                    | 20                                    | -6.710                 | -2.668                 | 4.042                              |

<sup>a</sup>Excitation maxima in HEPES Buffer at pH 7.2 <sup>b</sup>Fluorescence maxima in HEPES Buffer at pH 7.2. <sup>c</sup>Fluorescence quantum yield in HEPES Buffer at pH 7.2 relative to harmine in 0.1M H<sub>2</sub>SO<sub>4</sub> as a standard ( $\Phi = 45\%$ ). <sup>d</sup>The HOMO and LUMO and  $E_g$  of **CHMCs** using the TDDFT B3LYP/6-311G(d,p) method calculations.

### TDDFT study of probe CHMCs 4a-d

To study the electronic behaviour of **CHMCs 4a-d** time-dependent density functional theory (TDDFT) calculations were performed with a Gaussian 09 package.<sup>1</sup> The geometries were optimized at DFT/B3LYP level using a 6-31G(d,p) basis set. TDDFT calculations were performed using a B3LYP/6-311++G(d,p) method.

**Table S2.** Computed molecular orbital energy diagrams and isodensity surface plots of **CHMCs 4a-d** as obtained from TDDFT calculation and computed values of vertical excitations, oscillator strength ( $f$ ), assignment, HOMO, and LUMO values.

| Compound | $\lambda_{\max}$<br>(nm) | $f$    | Assignment                         |
|----------|--------------------------|--------|------------------------------------|
| 4a       | 351.56                   | 0.5329 | HOMO $\rightarrow$ LUMO (96.5%)    |
|          | 228.90                   | 0.1059 | HOMO $\rightarrow$ LUMO +2 (61.1%) |
| 4b       | 384.41                   | 0.3649 | HOMO-1 $\rightarrow$ LUMO (63.2%)  |
|          | 352.35                   | 0.2164 | HOMO-2 $\rightarrow$ LUMO (85.1%)  |
| 4c       | 368.94                   | 0.3104 | HOMO $\rightarrow$ LUMO (89.4%)    |
|          | 341.68                   | 0.1356 | HOMO-2 $\rightarrow$ LUMO (88.3%)  |
| 4d       | 342.45                   | 0.3979 | HOMO $\rightarrow$ LUMO (77.6%)    |
|          | 332.00                   | 0.1104 | HOMO-1 $\rightarrow$ LUMO (73.6%)  |

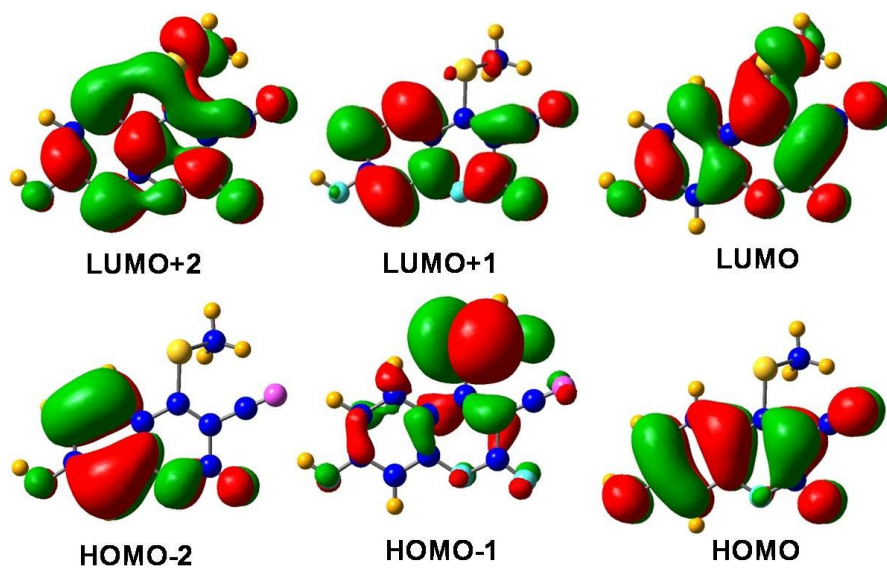

**Figure S1.** Computed molecular orbital energy diagrams and isodensity surface plots of compound **4a**.

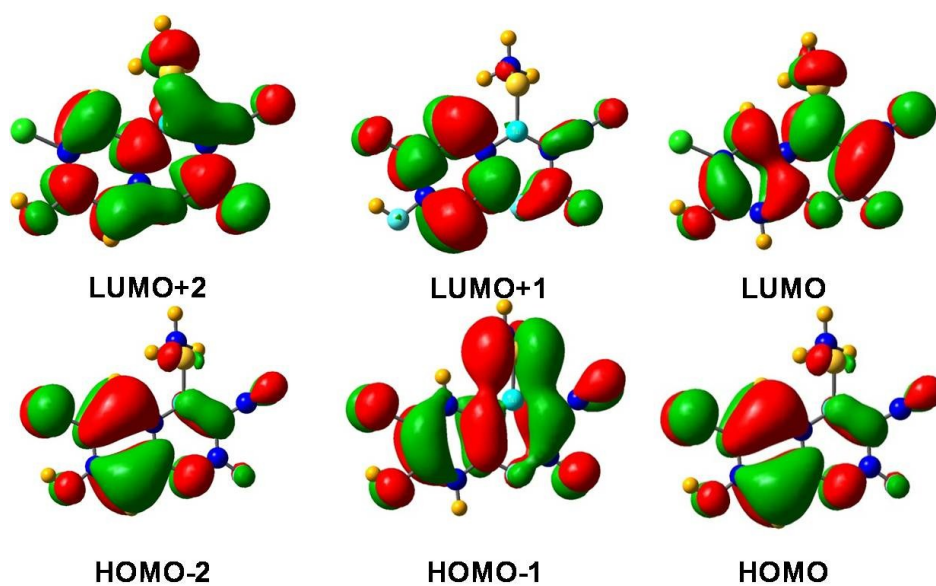

**Figure S2.** Computed molecular orbital energy diagrams and isodensity surface plots of compound **4b**.

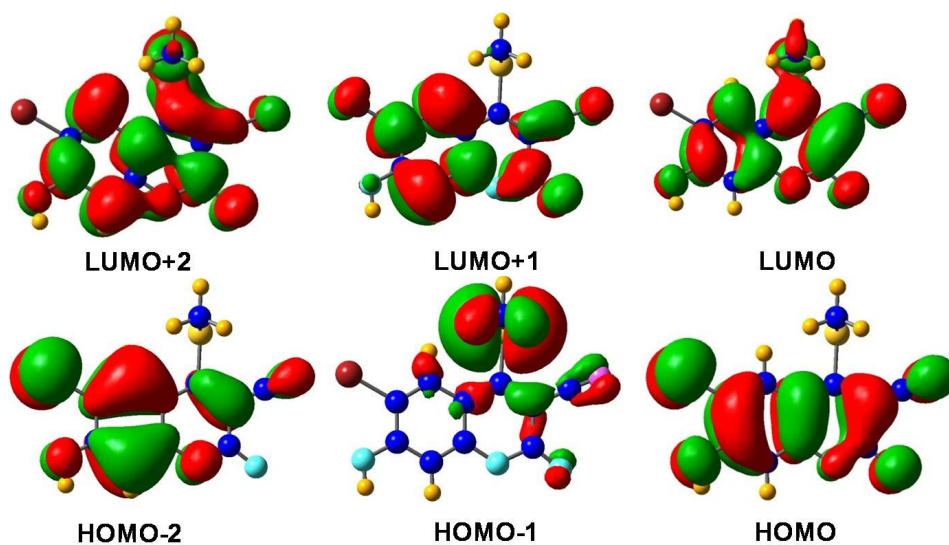

**Figure S3.** Computed molecular orbital energy diagrams and isodensity surface plots of compound **4c**.

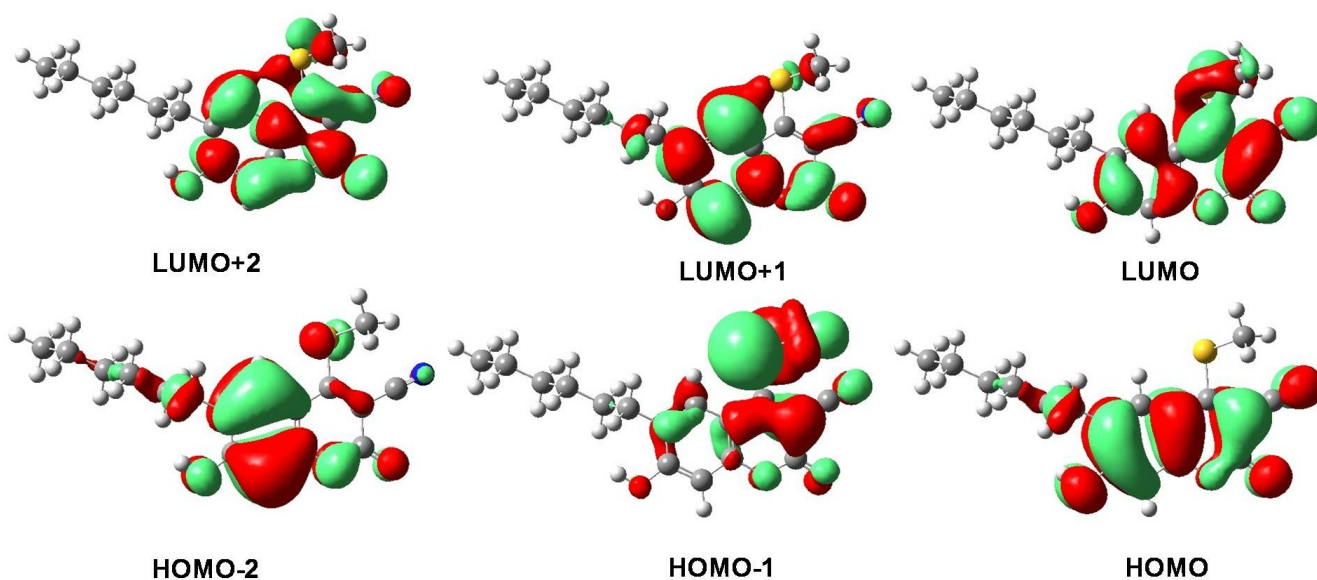

**Figure S4.** Computed molecular orbital energy diagrams and isodensity surface plots of compound **4d**.

**Cytotoxicity study in *Leishmania donovani* at 24 h**

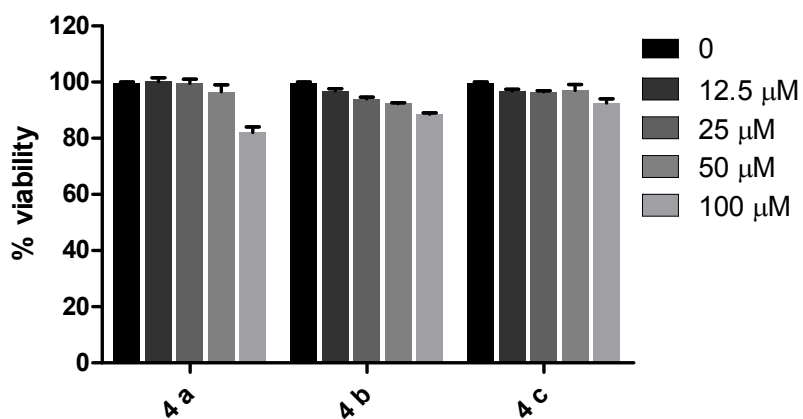

**Figure S5.** The cell viability assay of compounds **4a-c** (100  $\mu\text{M}$  to 12.5  $\mu\text{M}$ ) in *Leishmania donovani* promastigotes cells for 24 h at 26°C.

## MDY-64 staining in *S. cerevisiae* and *S. pombe*.

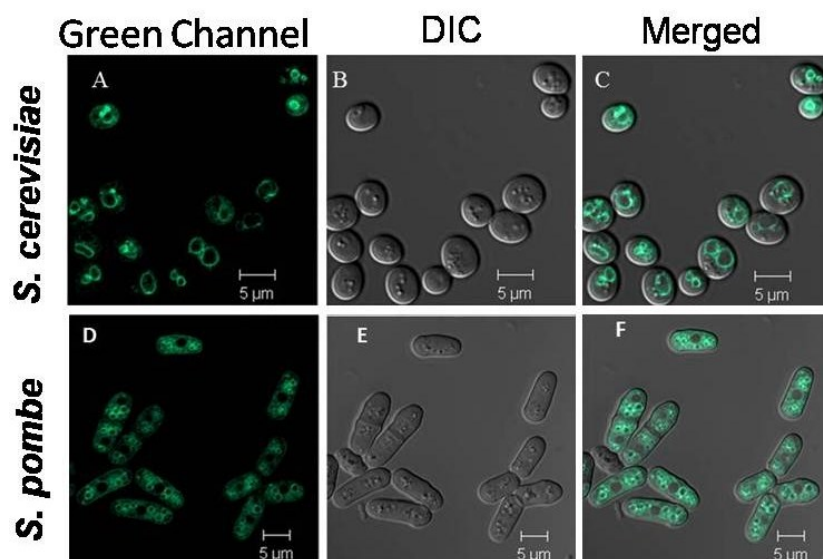

**Figure S6.** Confocal microscopy images showing **MDY-64** to stain the vacuolar membranes of *S. cerevisiae* and *S. Pombe*. **MDY-64**:  $\lambda_{\text{ex, max}} = 458 \text{ nm}$ ,  $\lambda_{\text{em, max}} = 491 \text{ nm}$ ; Scale bar: 5  $\mu\text{m}$ .

## Cytotoxicity study in yeast strains

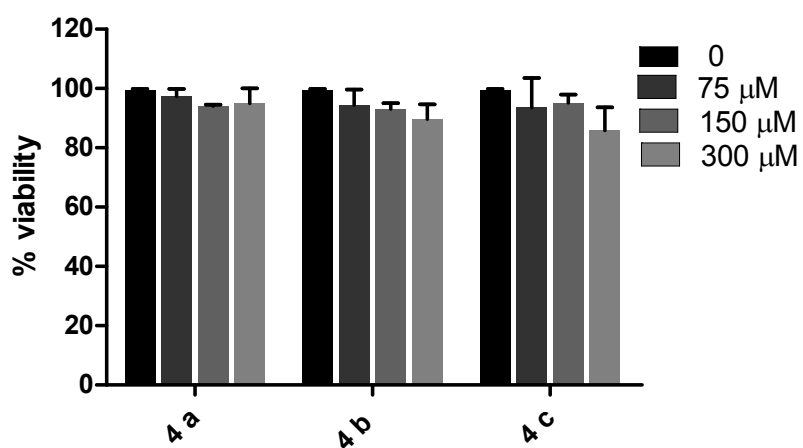

**Figure S7.** The cell viability assay of compounds **4a-c** (300  $\mu\text{M}$  to 75  $\mu\text{M}$ ) in *S. cerevisiae* yeast cells for 5 h at 26°C.

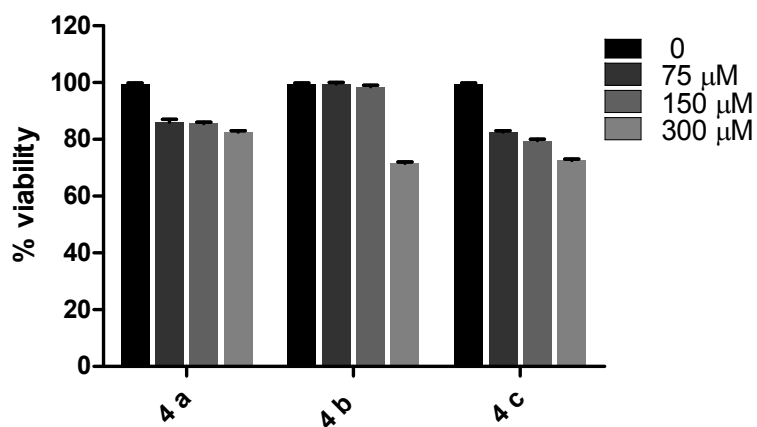

**Figure S8.** The cell viability assay of compounds **4a-c** (300  $\mu\text{M}$  to 75  $\mu\text{M}$ ) in *S. pombe* yeast cells for 5 h at 26°C.

#### Evaluation of photo-stability of the CHMC derivative (**4b**)

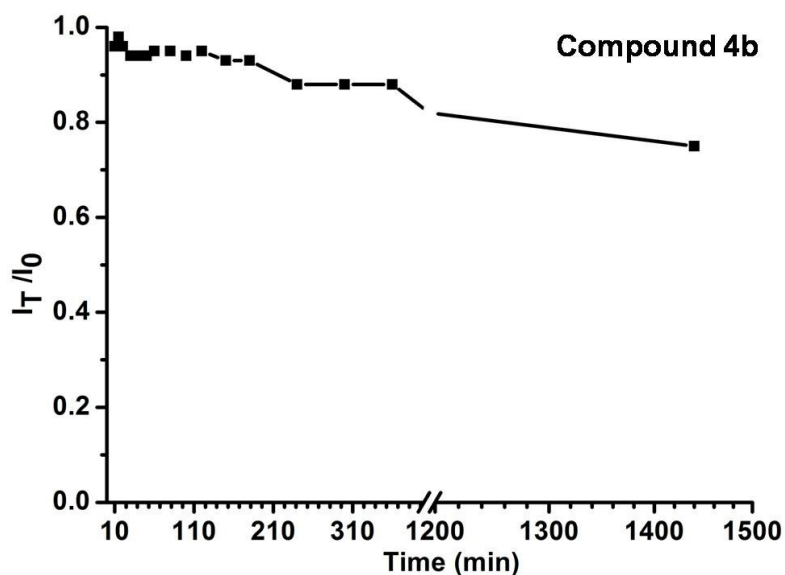

**pH Stability experiments:**

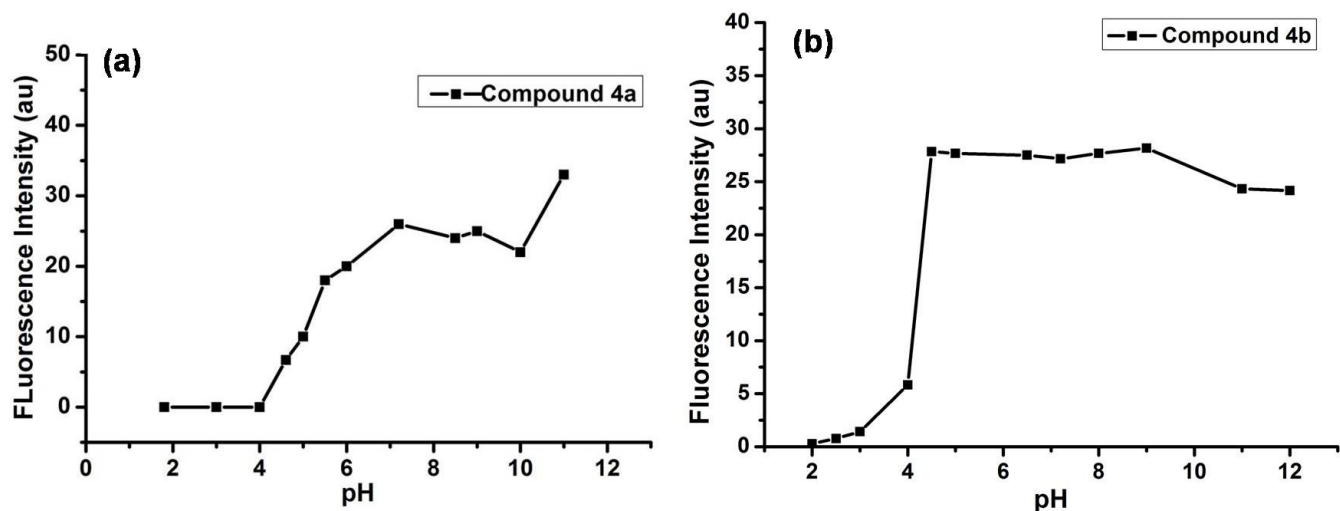

**Figure S10.** pH study of compound **4a, b** ( $2.5 \times 10^{-6}$  M) in solutions of different pH (TDW).  $\lambda_{\text{ex}} = 420$  nm.

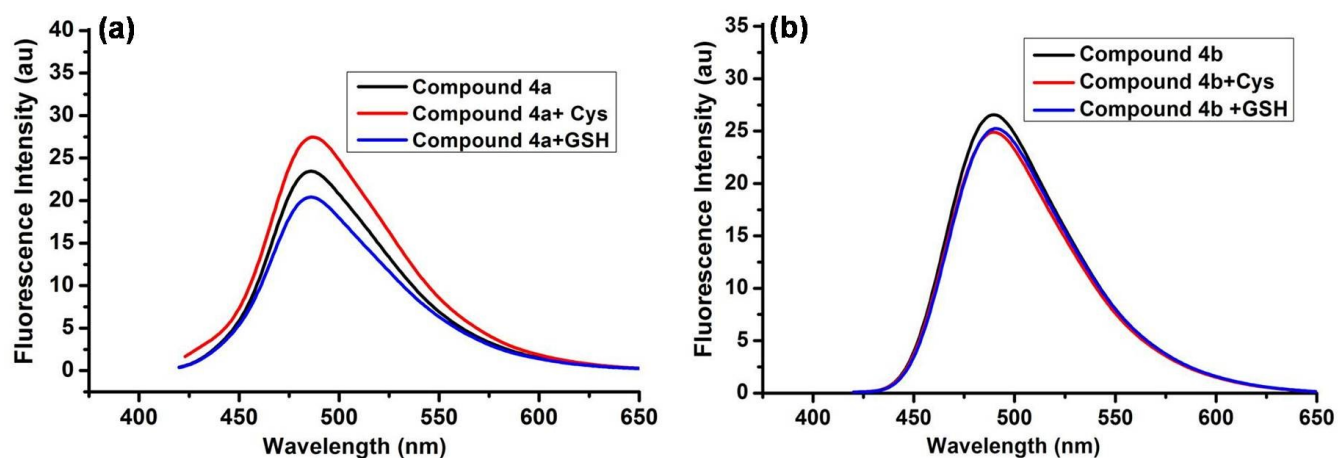

**Figure S11.** Competitive experiment between compound **4a,b**, Cysteine (Cys) and Glutathione (GSH). Variation in the fluorescence intensity of **4a,b** ( $2.5 \times 10^{-6}$  M) in presence of Cys (10mM), and GSH (10 mM).  $\lambda_{\text{ex}} = 420$  nm.



**$^1\text{H}$  and  $^{13}\text{C}$  NMR of 4a in  $\text{DMSO-}d_6$**

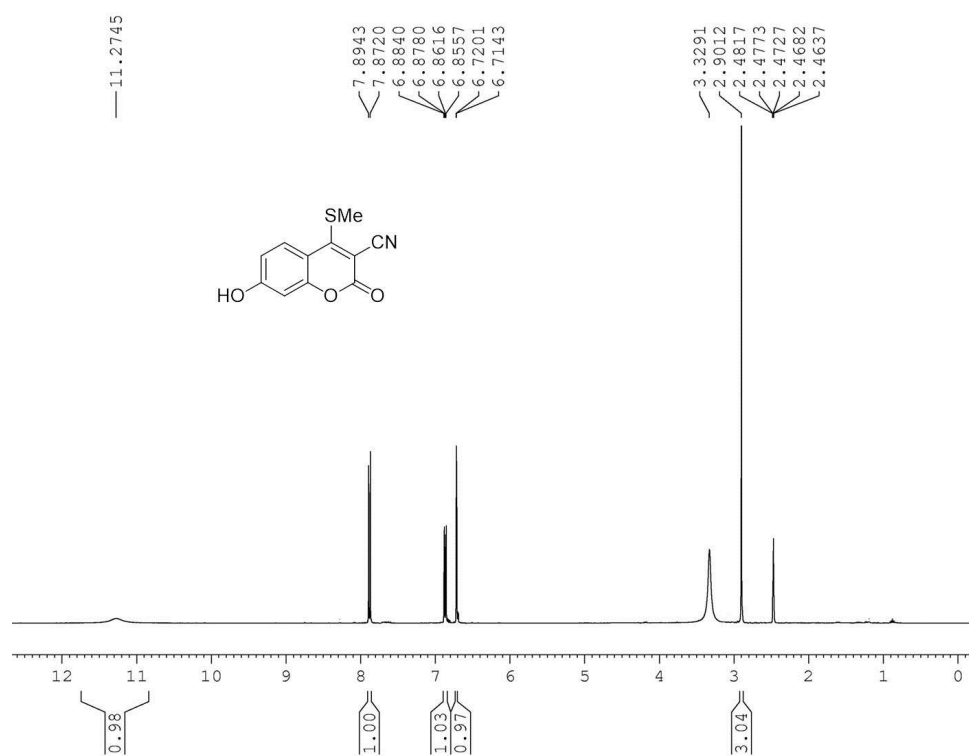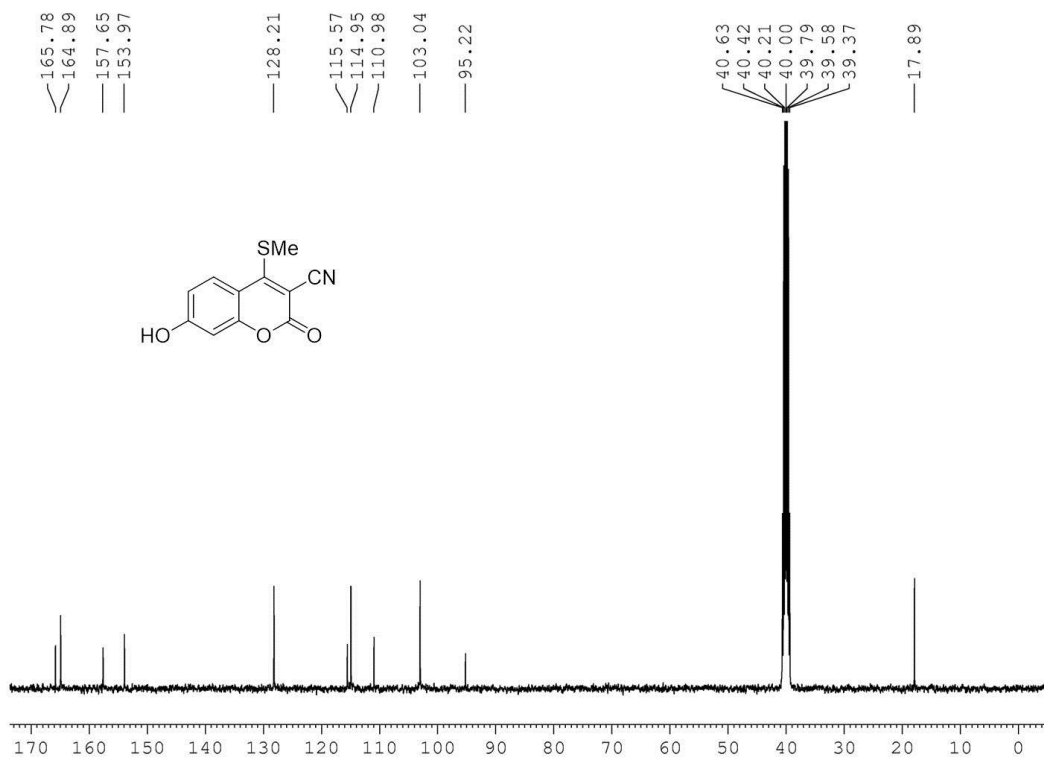

**$^1\text{H}$  and  $^{13}\text{C}$  NMR of 4b in  $\text{DMSO-}d_6$**

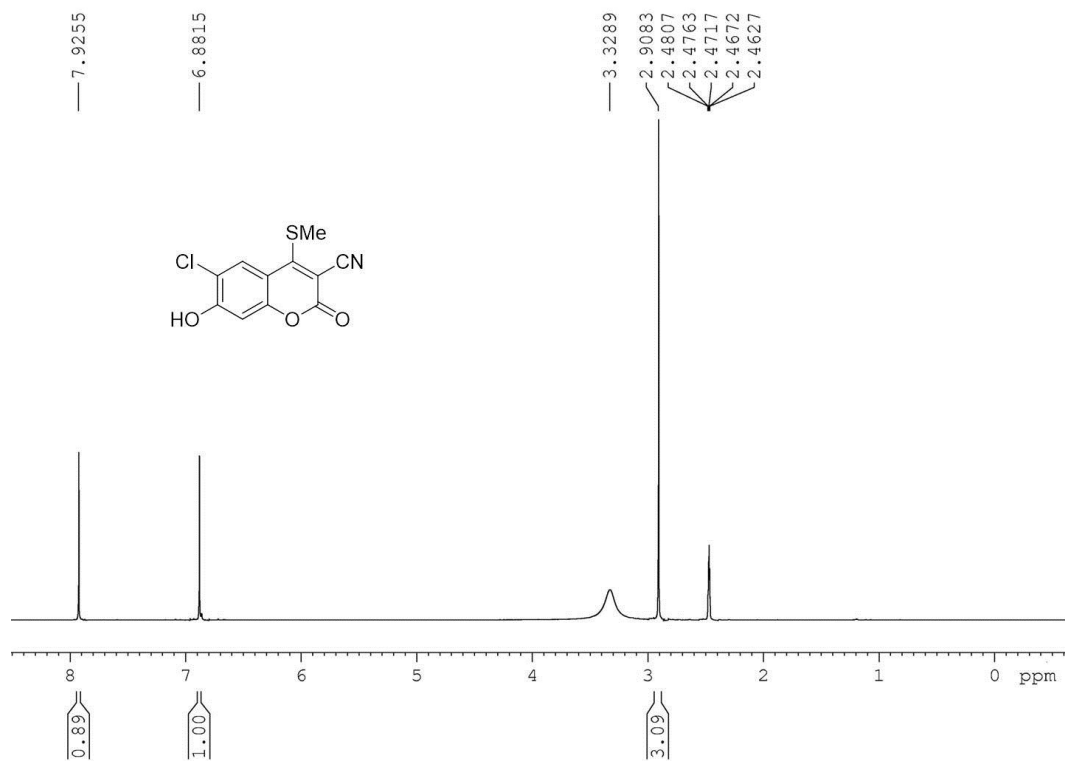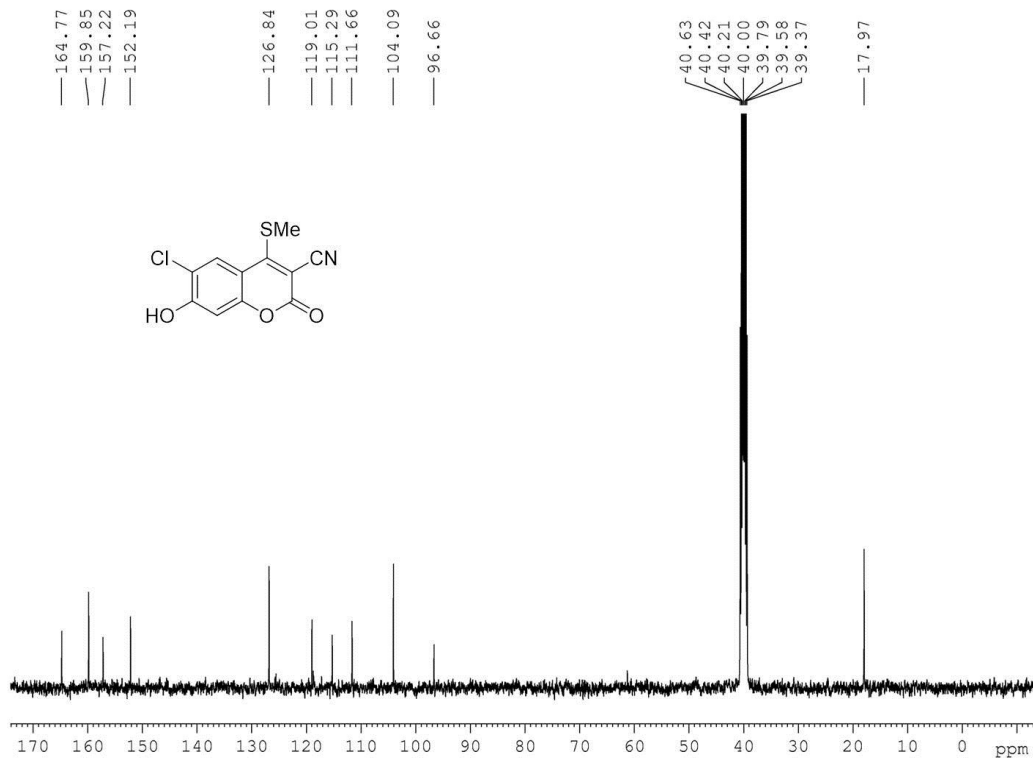

# <sup>1</sup>H and <sup>13</sup>C NMR of 4c in DMSO-d<sub>6</sub>

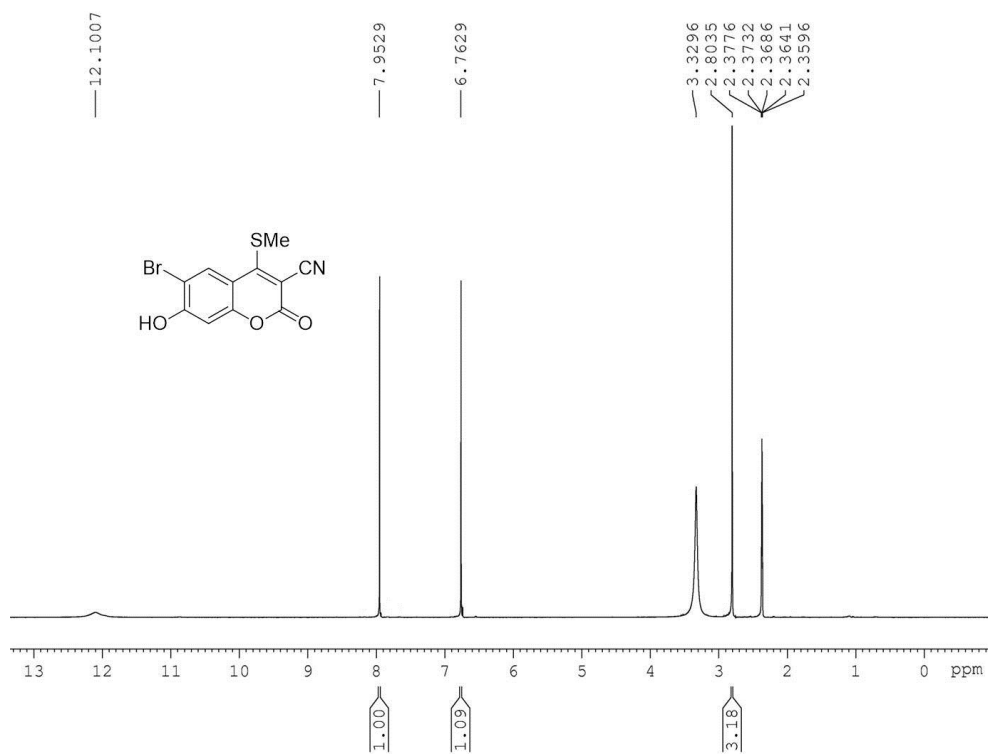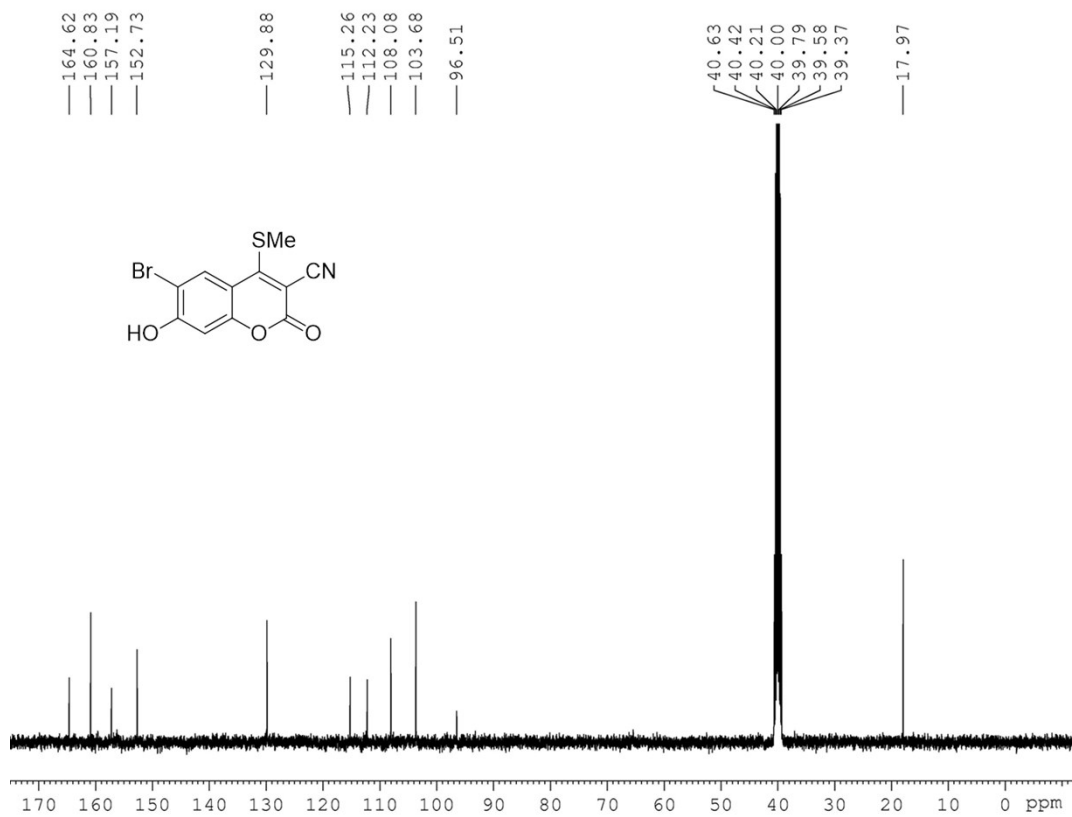

# <sup>1</sup>H and <sup>13</sup>C NMR of 4d in DMSO-d<sub>6</sub>

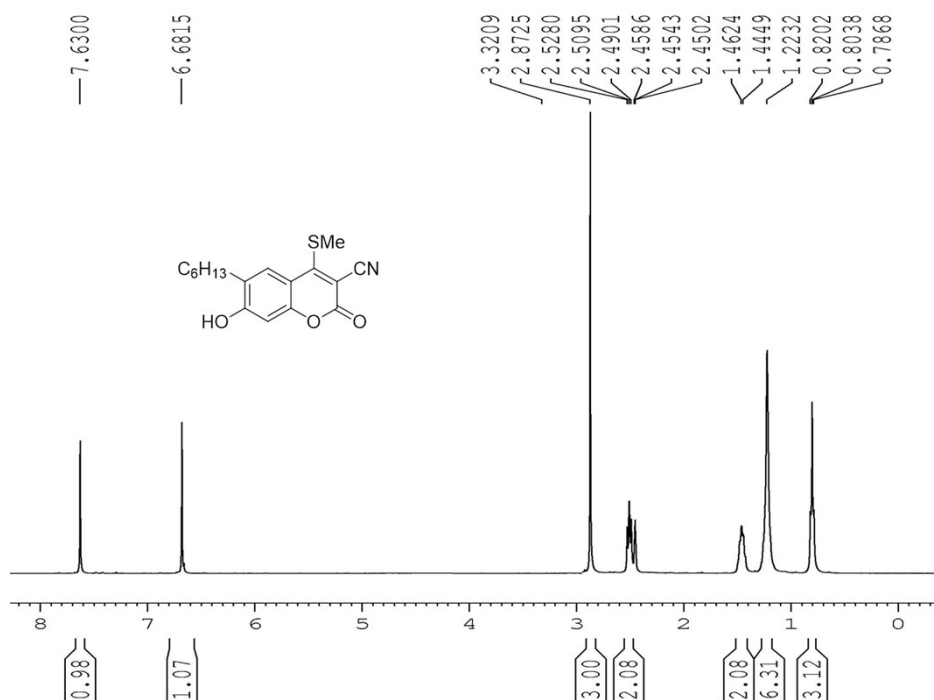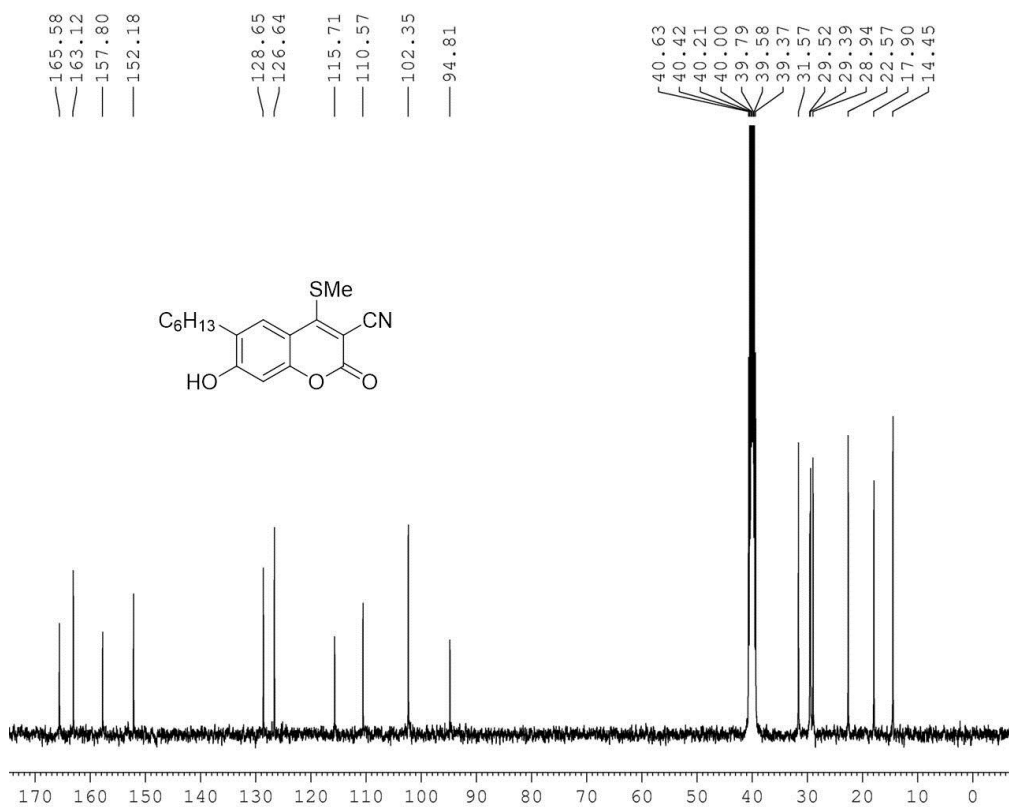

# $^1\text{H}$ and $^{13}\text{C}$ NMR of 5 in $\text{CDCl}_3$

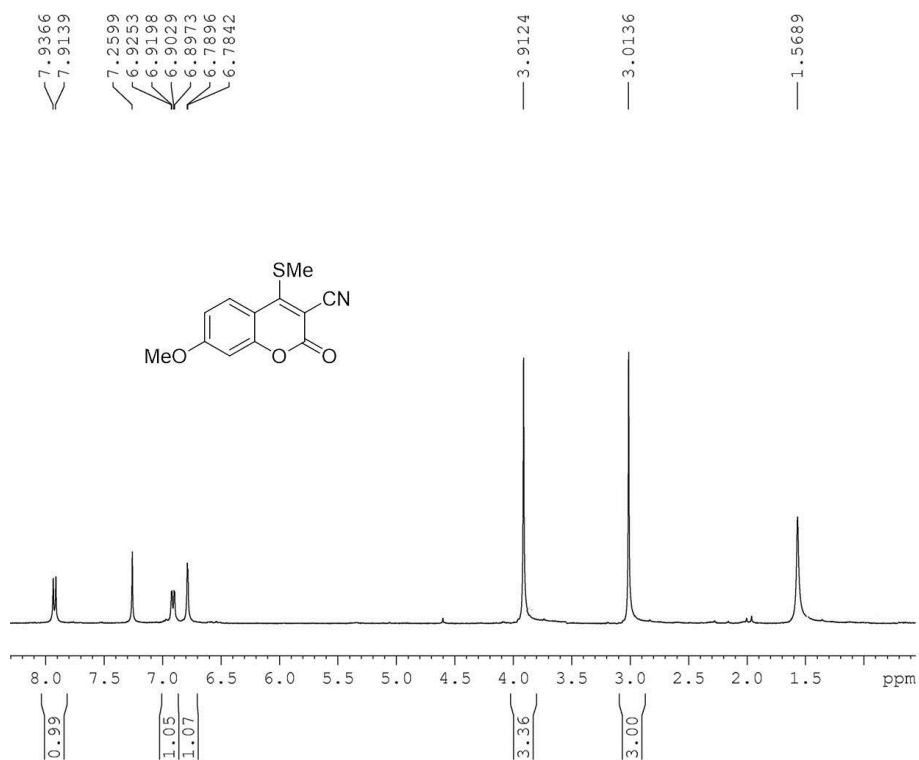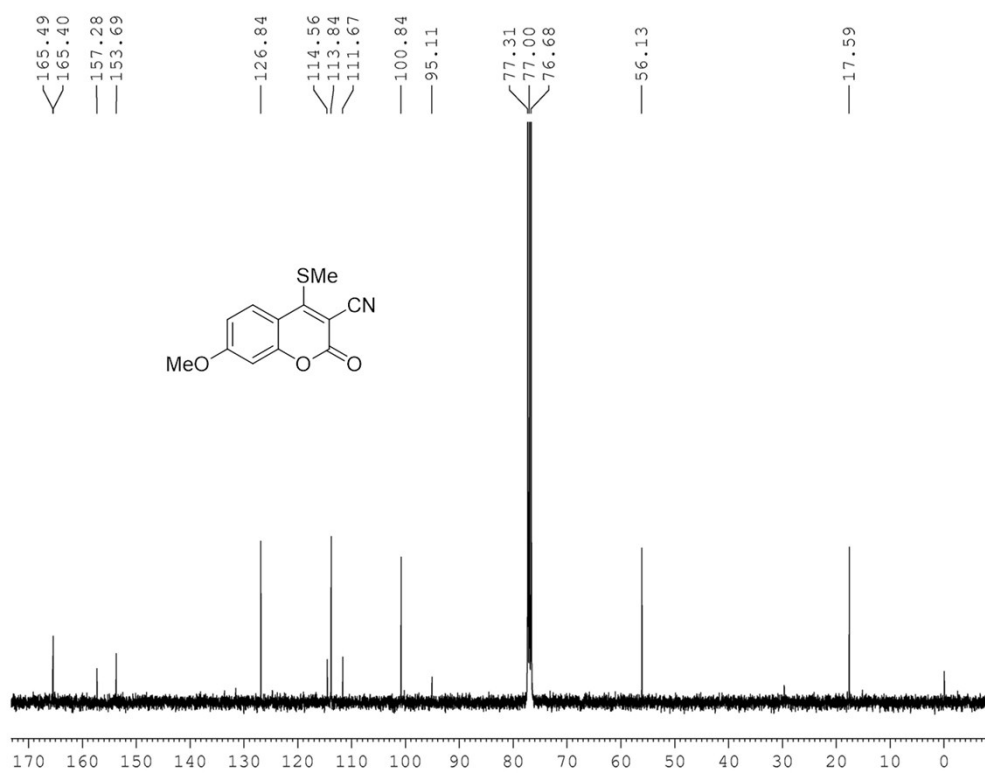

# <sup>1</sup>H and <sup>13</sup>C NMR of 6 in DMSO-d<sub>6</sub>

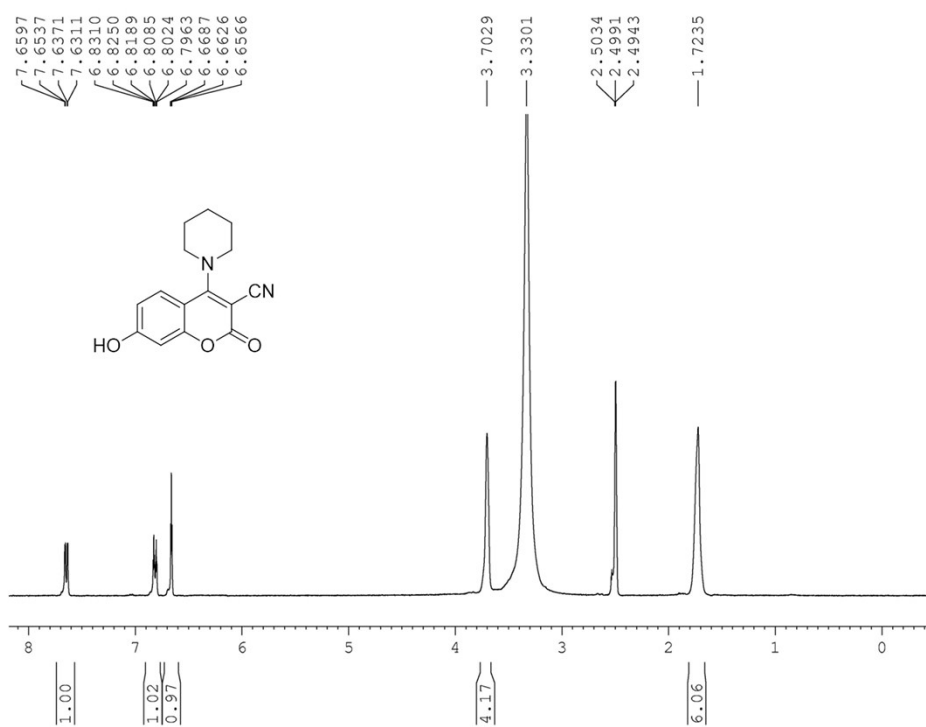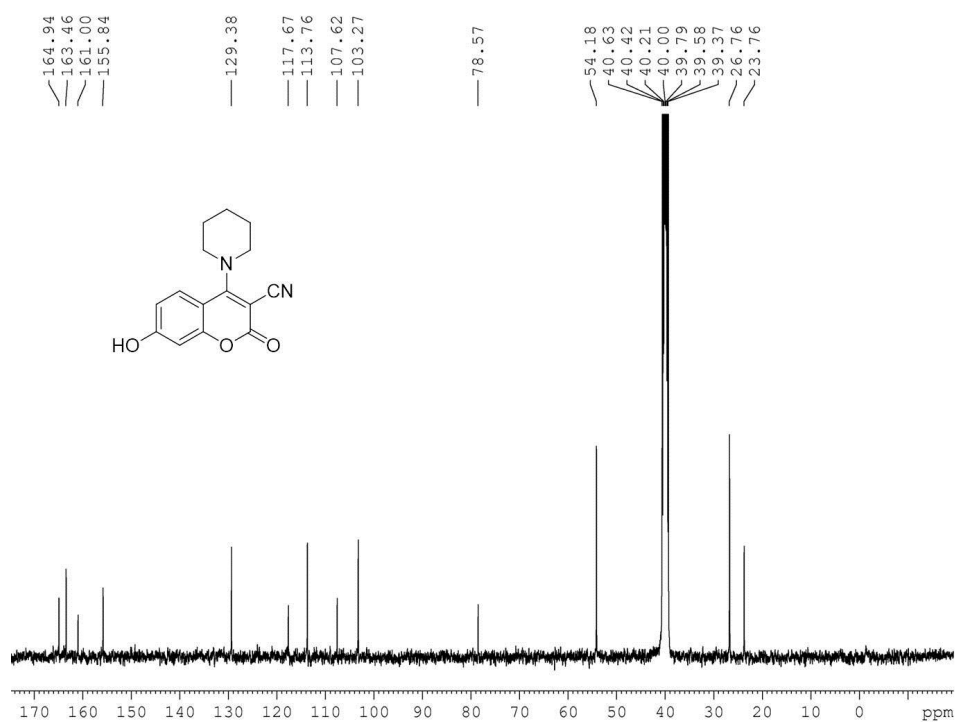

# <sup>1</sup>H and <sup>13</sup>C NMR of 8 in DMSO-d<sub>6</sub>

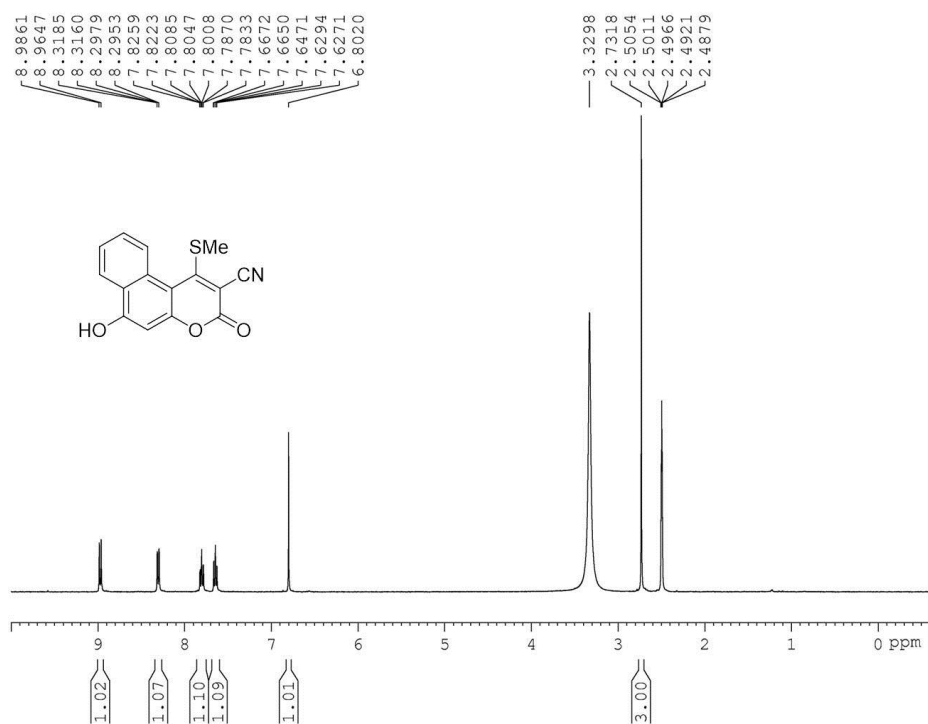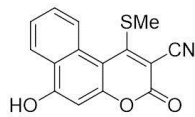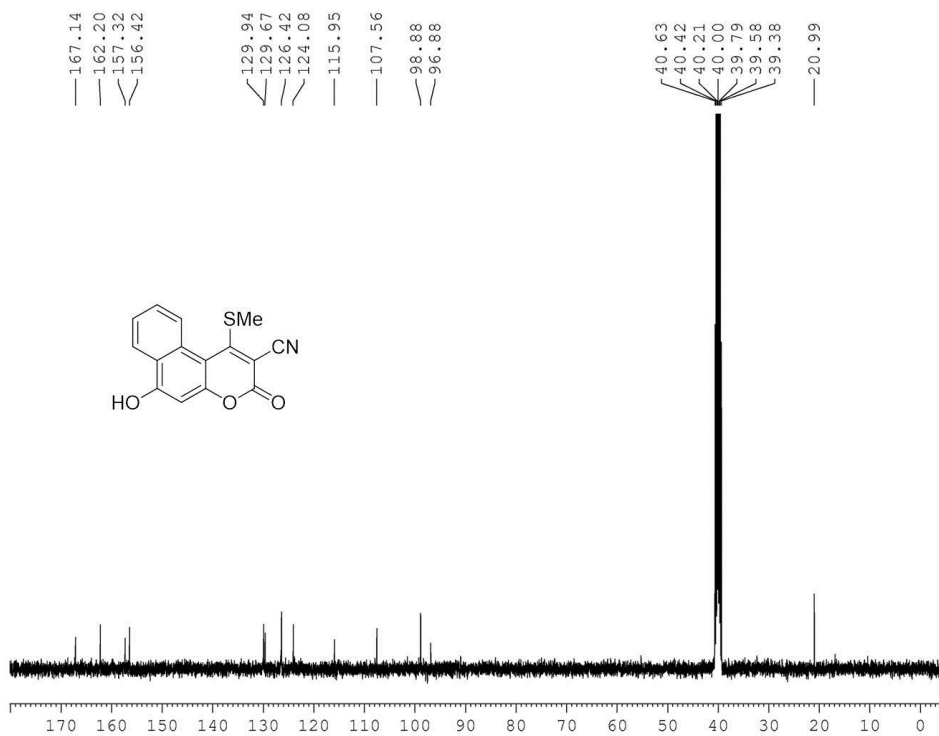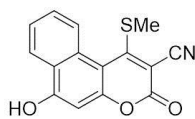

**Cartesian coordinates (Å) of CHMCs optimized at the B3LYP/6-31G(d,p)****Compound 4a**

| Atom | X           | Y           | Z           |
|------|-------------|-------------|-------------|
| C    | -3.43786980 | -0.15088969 | 0.03228947  |
| C    | -2.63417030 | 0.98921804  | 0.10617144  |
| C    | -1.25730419 | 0.86683111  | 0.03776495  |
| C    | -0.63144987 | -0.39552619 | -0.10790799 |
| C    | -1.46359475 | -1.53664123 | -0.16464758 |
| C    | -2.83608135 | -1.42091409 | -0.10014190 |
| H    | -3.08624310 | 1.96300412  | 0.21880627  |
| C    | 0.79755966  | -0.42927786 | -0.18615188 |
| H    | -1.00269744 | -2.51054632 | -0.25409852 |
| H    | -3.45480155 | -2.30876377 | -0.14483414 |
| C    | 1.52947868  | 0.73171945  | -0.11568871 |
| C    | 0.89854605  | 2.03888444  | 0.06745892  |
| O    | -4.78828920 | 0.03864028  | 0.10247261  |
| H    | -5.28436103 | -0.82039256 | 0.04414106  |
| S    | 1.62903697  | -2.05141559 | -0.44626972 |
| O    | 1.46462765  | 3.11918263  | 0.15512082  |
| O    | -0.51322095 | 2.02705988  | 0.12891149  |
| C    | 2.93648241  | 0.76923279  | -0.24761016 |
| N    | 4.09768470  | 0.81628310  | -0.35203018 |
| C    | 2.75439686  | -2.14901764 | 1.10471599  |
| H    | 2.14084424  | -1.97168941 | 1.98563239  |
| H    | 3.13158018  | -3.17163265 | 1.09203931  |
| H    | 3.56639378  | -1.43208873 | 1.01328580  |

**Compound 4b**

| Atom | X           | Y           | Z           |
|------|-------------|-------------|-------------|
| C    | 2.76213675  | -1.04087654 | 0.06787253  |
| C    | 1.64861757  | -1.88423210 | 0.12532752  |
| C    | 0.37359728  | -1.35844713 | 0.06192453  |
| C    | 0.13602750  | 0.03466505  | -0.05361957 |
| C    | 1.27085644  | 0.87186741  | -0.11079673 |
| C    | 2.54741770  | 0.33803059  | -0.05472328 |
| H    | 1.78924481  | -2.95349697 | 0.21767214  |
| C    | -1.22411881 | 0.45833711  | -0.10158341 |
| H    | 1.16713779  | 1.94526522  | -0.19993794 |
| C    | -2.28934306 | -0.50133091 | -0.07977646 |
| C    | -2.00258341 | -1.90012714 | 0.04095591  |
| O    | 3.99216869  | -1.60822506 | 0.13605619  |
| H    | 4.67487955  | -0.92386688 | 0.08429339  |
| S    | -1.62147828 | 2.11877495  | -0.50878718 |
| O    | -2.81267401 | -2.81026484 | 0.09342204  |
| O    | -0.66242931 | -2.26456102 | 0.11594132  |



|    |             |             |             |
|----|-------------|-------------|-------------|
| C  | -3.64209677 | -0.13147598 | -0.15981616 |
| N  | -4.75185566 | 0.21266944  | -0.23009542 |
| C  | -1.88419581 | 2.93001005  | 1.08227932  |
| H  | -0.99092992 | 2.79576994  | 1.69587631  |
| H  | -2.08996529 | 3.98050801  | 0.88706416  |
| H  | -2.73197238 | 2.44297478  | 1.57166492  |
| Cl | 3.94551955  | 1.40527327  | -0.12805834 |

#### Compound 4c

| Atom | X           | Y           | Z           |
|------|-------------|-------------|-------------|
| C    | 2.02131928  | 0.15099985  | -0.04777192 |
| C    | 2.02981954  | 1.55050106  | 0.13881855  |
| C    | 0.82092291  | 2.24390753  | 0.20585095  |
| C    | -0.36677413 | 1.53924417  | 0.09184167  |
| C    | -0.40658790 | 0.13902770  | -0.08131176 |
| C    | 0.83338184  | -0.53653209 | -0.15863689 |
| O    | -1.54174606 | 2.28007084  | 0.14469144  |
| C    | -2.81545519 | 1.69939654  | 0.01100357  |
| C    | -2.84564605 | 0.24756736  | -0.14837361 |
| C    | -1.68948831 | -0.50041214 | -0.18054460 |
| S    | -1.80900183 | -2.33264138 | -0.41835803 |
| O    | -3.79107467 | 2.44965174  | 0.05302553  |
| C    | -1.44657061 | -2.91245820 | 1.36765072  |
| Br   | 3.70444428  | -0.80332676 | -0.15900699 |
| O    | 3.24411927  | 2.17431344  | 0.23786370  |
| C    | -4.14467668 | -0.32768365 | -0.24954398 |
| N    | -5.22762562 | -0.75692742 | -0.32792280 |
| H    | 0.79447557  | 3.31519204  | 0.33692554  |
| H    | 0.84134146  | -1.60164062 | -0.32319837 |
| H    | -1.48812185 | -3.99552870 | 1.31600738  |
| H    | -0.45948150 | -2.58442597 | 1.67143152  |
| H    | -2.21666992 | -2.52938322 | 2.02618514  |
| H    | 3.17845845  | 3.13934036  | 0.34854037  |

#### Compound 4d

| Atom | X           | Y           | Z           |
|------|-------------|-------------|-------------|
| C    | -0.93329871 | 0.72319649  | -0.78341736 |
| C    | -0.67628781 | 2.08411786  | -0.53511173 |
| C    | 0.57401416  | 2.51838723  | -0.14173736 |
| C    | 1.58548554  | 1.59566537  | 0.02260051  |
| C    | 1.38482217  | 0.23643869  | -0.20193207 |
| C    | 0.10670594  | -0.16118663 | -0.61697932 |

|   |             |             |             |
|---|-------------|-------------|-------------|
| O | 2.78459238  | 2.08296405  | 0.39416210  |
| C | 3.87031522  | 1.31507611  | 0.60442046  |
| C | 3.68612349  | -0.13612156 | 0.42715984  |
| C | 2.51047619  | -0.66341397 | 0.01416281  |
| O | 4.88580448  | 1.82672038  | 0.92135762  |
| O | -1.61548215 | 3.02934211  | -0.67321292 |
| S | 2.21820919  | -2.39963395 | -0.21308995 |
| C | 3.65344341  | -3.00847423 | -1.15114531 |
| C | 4.82451139  | -0.92973421 | 0.79798306  |
| N | 5.71368186  | -1.56707985 | 1.10414309  |
| C | -8.03360069 | -1.14783814 | 1.39507302  |
| C | -7.05124636 | -1.00417546 | 0.23390746  |
| C | -5.66959118 | -0.52002263 | 0.67634433  |
| C | -4.68095881 | -0.37484678 | -0.48145590 |
| C | -3.30031708 | 0.10852947  | -0.03552886 |
| C | -2.30667954 | 0.23642656  | -1.20112869 |
| H | 0.75855805  | 3.56032941  | 0.03167545  |
| H | -0.06923970 | -1.19957472 | -0.81967739 |
| H | -2.43403999 | 2.67611310  | -0.97727699 |
| H | 3.30921955  | -3.92616514 | -1.60921054 |
| H | 3.92081746  | -2.30569870 | -1.92705682 |
| H | 4.49787725  | -3.20937262 | -0.51472267 |
| H | -9.00284613 | -1.49249163 | 1.04865799  |
| H | -7.67145056 | -1.86211411 | 2.12923732  |
| H | -8.18204962 | -0.19907192 | 1.90321875  |
| H | -7.45809979 | -0.31032137 | -0.49935240 |
| H | -6.95112222 | -1.96109254 | -0.27476212 |
| H | -5.26377615 | -1.21427927 | 1.41057297  |
| H | -5.77081379 | 0.43700601  | 1.18635141  |
| H | -5.08781625 | 0.31804183  | -1.21737848 |
| H | -4.57874984 | -1.33205576 | -0.99053333 |
| H | -2.88805456 | -0.58089343 | 0.69696333  |
| H | -3.39765329 | 1.06402131  | 0.47743962  |
| H | -2.72248109 | 0.88753709  | -1.97052479 |
| H | -2.19822113 | -0.73057282 | -1.68092769 |
